# Supplementary material for: Detection of EGFR Mutations in Plasma Cell-Free Tumor DNA of TKI-Treated Advanced-NSCLC Patients by Three Methodologies: Scorpion-ARMS, PNAClamp, and Digital PCR
Source: Diagnostics (Basel). 2020 Dec 7;10(12):1062. doi: 10.3390/diagnostics10121062 (PMC7762356; doi:10.3390/diagnostics10121062)
Supplement: Supplementary file 1 [file diagnostics-10-01062-s001.zip › diagnostics-1001893_Table S1.pdf]

**Table 1. Number of EGFR mutated copies as quantified by QuantStudio 3D Digital PCR assay at baseline.** The amount of the three main *EGFR* mutations in cell-free DNA is reported as copied/ul of plasma (ND, not determined; WT, wild type for the specific mutation). Results in the table are referred to Figure 2.

| <b>Patient ID</b> | <b>T790M</b> | <b>Exon 19 deletion</b> | <b>L858R</b> |
|-------------------|--------------|-------------------------|--------------|
| 1                 | 0.423        | WT                      | WT           |
| 2                 | 0.381        | 0.774                   | WT           |
| 3                 | ND           | ND                      | ND           |
| 4                 | WT           | 0.416                   | WT           |
| 5                 | 0.938        | WT                      | WT           |
| 6                 | WT           | WT                      | 0.417        |
| 7                 | WT           | 0.379                   | WT           |
| 8                 | ND           | ND                      | ND           |
| 9                 | 0.374        | 0.447                   | WT           |
| 10                | WT           | 5.938                   | WT           |
| 11                | WT           | 201.07                  | WT           |
| 12                | WT           | 171.75                  | WT           |
| 13                | WT           | 4.047                   | WT           |
| 14                | WT           | 2.888                   | WT           |
| 15                | WT           | 0.481                   | WT           |
| 16                | WT           | 12.221                  | WT           |
| 17                | ND           | ND                      | ND           |
| 18                | WT           | 0.36                    | WT           |
| 19                | ND           | ND                      | ND           |
| 20                | ND           | ND                      | ND           |
| 21                | WT           | 0.408                   | WT           |
| 22                | ND           | ND                      | ND           |
| 23                | 1.69         | WT                      | WT           |
| 24                | 2.826        | WT                      | 3916.4       |
| 25                | WT           | 0.442                   | WT           |

|    |        |        |        |
|----|--------|--------|--------|
| 26 | WT     | 17.53  | WT     |
| 27 | ND     | ND     | ND     |
| 28 | 16.092 | WT     | 14.023 |
| 29 | WT     | 0.466  | WT     |
| 30 | WT     | 153.15 | WT     |
| 31 | ND     | ND     | ND     |
