# Supplementary material for: Detection of EGFR Mutations in Plasma Cell-Free Tumor DNA of TKI-Treated Advanced-NSCLC Patients by Three Methodologies: Scorpion-ARMS, PNAClamp, and Digital PCR
Source: Diagnostics (Basel). 2020 Dec 7;10(12):1062. doi: 10.3390/diagnostics10121062 (PMC7762356; doi:10.3390/diagnostics10121062)
Supplement: Supplementary file 1 [file diagnostics-10-01062-s001.zip › diagnostics-1001893_Table-S2.pdf]

|            | T790M-DIGITAL PCR (COPIES/μl) |       |       |        |        | DEL19-DIGITAL PCR (COPIES/μl) |       |       |       |        | L858R-DIGITAL PCR (COPIES/μL) |        |        |        |        |
|------------|-------------------------------|-------|-------|--------|--------|-------------------------------|-------|-------|-------|--------|-------------------------------|--------|--------|--------|--------|
| Patient ID | T0                            | T8    | T20   | EV     | PD     | T0                            | T8    | T20   | EV    | PD     | T0                            | T8     | T20    | EV     | PD     |
| 1          | 0.423                         | 0     | 0     | 0      | ND     | 0                             | 2.166 | 0     | 0.572 | ND     | ND                            | ND     | ND     | ND     | ND     |
| 2          | 0.381                         | 0     | 0.382 | 0.387  | 0.793  | 0.774                         | 0     | 0.373 | 0.42  | 2,077  | ND                            | ND     | ND     | ND     | ND     |
| 3          | 0                             | 0     | 0     | 0.385  | ND     | ND                            | ND    | ND    | ND    | ND     | ND                            | ND     | ND     | ND     | ND     |
| 4          | 0                             | 0.39  | 0     | 0.388  | ND     | 0.416                         | 0     | 0     | 0     | ND     | ND                            | ND     | ND     | ND     | ND     |
| 5          | 0.938                         | 0     | 0     | 1.091  | 1.957  | ND                            | ND    | ND    | ND    | ND     | 0                             | 1.157  | 0.361  | 0      | 0      |
| 6          | 0                             | 0     | 0     | 0      | 0.382  | ND                            | ND    | ND    | ND    | ND     | 0.417                         | 0.41   | 0      | 0      | 0.376  |
| 7          | 0                             | 0     | 0     | 0.383  | 0      | 0.379                         | 0     | 0     | 0     | 0      | ND                            | ND     | ND     | ND     | ND     |
| 8          | 0                             | 0     | 0.397 | ND     | 0      | ND                            | ND    | ND    | ND    | ND     | 0                             | 0.392  | 0      |        | 1.871  |
| 9          | 0.374                         | 0     | 0     | 0      | 1.664  | 0.447                         | 1.105 | 0     | 0     | 1.579  | ND                            | ND     | ND     | ND     | ND     |
| 10         | 0                             | 0     | 0     | 0      | 0.812  | 5.938                         | 0.365 | 1.201 | 0     | 3,055  | ND                            | ND     | ND     | ND     | ND     |
| 11         | 0                             | 0     | 0     | 0      | 1.656  | 201.07                        | 2.248 | 0     | 0     | 10.307 | ND                            | ND     | ND     | ND     | ND     |
| 12         | 0                             | 0     | 0     | 0      | ND     | 171.75                        | 3.612 | 0     | 0     | ND     | ND                            | ND     | ND     | ND     | ND     |
| 13         | 0                             | 0     | 0     | 0      | ND     | 4.047                         | 0.384 | 0     | 0     | ND     | ND                            | ND     | ND     | ND     | ND     |
| 14         | 0                             | 0     | 0     | 0      | 0      | 2.888                         | 0     | 0.532 | 0.386 | 1.602  | ND                            | ND     | ND     | ND     | ND     |
| 15         | 0                             | 0     | 0     | 0      | 0.432  | 0.481                         | 0     | 0     | 0     | 0.422  | ND                            | ND     | ND     | ND     | ND     |
| 16         | 0                             | 0     | 0     | 0      | 2.009  | 12.221                        | 5.707 | 0.393 | 0     | 33.686 | ND                            | ND     | ND     | ND     | ND     |
| 17         | 0                             | 0     | 0     | 0      | 0      | 0                             | 0.934 | 0     | 0     | 0      | ND                            | ND     | ND     | ND     | ND     |
| 18         | 0                             | 0     | 0     | 0      | 0.382  | 0.36                          | 0.522 | 0     | 0     | 0.363  | ND                            | ND     | ND     | ND     | ND     |
| 19         | 0                             | 0     | 0     | 0      | ND     | 0                             | 0     | 0     | 0     | ND     | ND                            | ND     | ND     | ND     | ND     |
| 20         | 0                             | 0     | 0     | 0      | ND     | ND                            | ND    | ND    | ND    | ND     | ND                            | ND     | ND     | ND     | ND     |
| 21         | 0                             | 0     | 0     | 0      | ND     | 0.408                         | 0     | 0     | 0     | ND     | ND                            | ND     | ND     | ND     | ND     |
| 22         | 0                             | 0     | 0     | 0      | ND     | ND                            | ND    | ND    | ND    | ND     | 0                             | 0      | 0      | 0      | ND     |
| 23         | 1.69                          | 0     | 0     | 0      | ND     | ND                            | ND    | ND    | ND    | ND     | ND                            | ND     | ND     | ND     | ND     |
| 24         | 2.826                         | 0.455 | 0     | 0.473  | 99.902 | ND                            | ND    | ND    | ND    | ND     | 3916.4                        | 20.862 | 4.668  | 0.732  | 319.94 |
| 25         | 0                             | ND    | 0     | 0      | 0      | 0.442                         | ND    | 0     | 3.56  | 0      | ND                            | ND     | ND     | ND     | ND     |
| 26         | 0                             | 0.436 | 0.409 | 0.81   | 0      | 17.53                         | 1.615 | 0     | 0     | 0.468  | ND                            | ND     | ND     | ND     | ND     |
| 27         | 0                             | 0     | 0     | 0      | ND     | ND                            | ND    | ND    | ND    | ND     | 0                             | 0      | 0      | 0      | ND     |
| 28         | 16.092                        | 3.229 | 8.53  | 49.664 | 0.768  | ND                            | ND    | ND    | ND    | ND     | 14.023                        | 2.627  | 13.717 | 38.613 | 0.859  |
| 29         | 0                             | 0     | 0     | 0      | ND     | 0.466                         | 1.183 | 0.354 | 0     | ND     | ND                            | ND     | ND     | ND     | ND     |
| 30         | 0                             | 0     | 0     | 0      | ND     | 153.15                        | 3.083 | 0     | 0     | ND     | ND                            | ND     | ND     | ND     | ND     |
| 31         | 0                             | 0     | 0     | 0      | 0      | ND                            | ND    | ND    | ND    | ND     | ND                            | ND     | ND     | ND     | ND     |

T0: baseline  
 T8: 8 days after treatment  
 T20: 20 days ater treatment  
 EV: first clinical evaluation  
 PD: progressive disease  
 ND: not determined
